# Supplementary material for: Molecular Dynamics Study of Cellulose Nanofiber Alignment under an Electric Field
Source: MDPI journal article supplement (doi:10.3390/polym14091925), 2022-05-09
Supplement: s1 [file s1]

## SUPPORTING INFORMATION

**Table S1.** Snapshots of CNF alignment along the applied external electric field (z-axis) for the replica MD (0.06 mV/nm<sub>1</sub> and 0.06 mV/nm<sub>2</sub>).

| Electric field (mV/nm) | 0                                                                                           | 1 ns                                                                              | 2 ns                                                                              | 3 ns | 4 ns                                                                                                  | 5 ns | 6 ns | 7 ns                                                                               | 8 ns                                                                                                                                                                | 9 ns | 10 ns | >10ns to 28ns                                                             |
|------------------------|---------------------------------------------------------------------------------------------|-----------------------------------------------------------------------------------|-----------------------------------------------------------------------------------|------|-------------------------------------------------------------------------------------------------------|------|------|------------------------------------------------------------------------------------|---------------------------------------------------------------------------------------------------------------------------------------------------------------------|------|-------|---------------------------------------------------------------------------|
| 0.06_1                 | Stable<br> |  |  |      | Aligned & stable<br> |      |      |  | Completely aligned at 1.16ns, slight twisting at 4 ns, lost alignment at 8 ns<br> |      |       | —                                                                         |
| 0.06_2                 | Stable<br> |  |  |      | Aligned & stable<br> |      |      |  | Completely aligned at 1.20 ns, no twisting, lost alignment at 8.01 ns<br>         |      |       | No realignment after loss of alignment<br>Characterized by mild rotations |

**Table S2.** Electric field along the z-axis: the root-mean-square displacement (RMSD), radius of gyration (Rg), and end-to-end length, averaged over 10 ns of simulation time.

| Model                           | Electric Field Strength (mV/nm) | RMSD average (nm) | Rg average (nm) | End-to-end length (nm) |
|---------------------------------|---------------------------------|-------------------|-----------------|------------------------|
| Crystalline Cellulose 1 $\beta$ | No field                        | 0.101 $\pm$ 0.02  | 3.178           | 11.000 $\pm$ 0.01      |
|                                 | 0.001                           | 0.105 $\pm$ 0.03  | 3.178           | 11.002 $\pm$ 0.01      |
|                                 | 0.005                           | 0.105 $\pm$ 0.03  | 3.178           | 11.006 $\pm$ 0.02      |
|                                 | 0.01                            | 0.105 $\pm$ 0.02  | 3.178           | 11.003 $\pm$ 0.02      |
|                                 | 0.06                            | 0.105 $\pm$ 0.03  | 3.178           | 11.005 $\pm$ 0.02      |
|                                 | 0.09                            | 0.106 $\pm$ 0.02  | 3.178           | 11.006 $\pm$ 0.02      |
|                                 | 0.2                             | 0.111 $\pm$ 0.02  | 3.178           | 11.008 $\pm$ 0.01      |

\*Zero standard deviation for Rg

**Table S3.** Averages of the reproducible hydrogen bonds, radius of gyration, and end-to-end length at the 0.06 mV/nm electric field with repeat productions (0.06 mV/nm\_1: the first MD production 0.06 mV/nm\_2: the second MD production).

| Model                                            | Electric Field Strength (mV/nm) | Hydrogen Bonds Overall | Average Rg (nm) | End-to-end length (nm) |
|--------------------------------------------------|---------------------------------|------------------------|-----------------|------------------------|
| <b>Crystalline Cellulose 1<math>\beta</math></b> | 0.06mV/nm_1                     | 766 $\pm$ 12           | 3.178           | 11.005 $\pm$ 0.02      |
|                                                  | 0.06mV/nm_2                     | 765 $\pm$ 14           | 3.178           | 11.006 $\pm$ 0.04      |

**Table S4.** Electric field along the x-axis: RMSD, the radius of gyration (Rg), end-to-end length, and hydrogen bond population.

| Model                                            | Electric Field Strength (mV/nm) | RMSD average (nm) | Rg average (nm) | End-to-end length (nm) | Hydrogen bond population (%) |
|--------------------------------------------------|---------------------------------|-------------------|-----------------|------------------------|------------------------------|
| <b>Crystalline Cellulose 1<math>\beta</math></b> | 0                               | 0.104 $\pm$ 0.02  | 3.178           | 11.000 $\pm$ 0.01      | 758.538 $\pm$ 12.83          |
|                                                  | 1                               | 0.112 $\pm$ 0.02  | 3.178           | 11.006 $\pm$ 0.01      | 752.930 $\pm$ 13.86          |
|                                                  | 2                               | 0.123 $\pm$ 0.02  | 3.1782          | 11.009 $\pm$ 0.02      | 749.402 $\pm$ 15.49          |
|                                                  | 4.5                             | 0.128 $\pm$ 0.03  | 3.178           | 11.008 $\pm$ 0.01      | 748.882 $\pm$ 13.44          |

\*Zero standard deviation for Rg

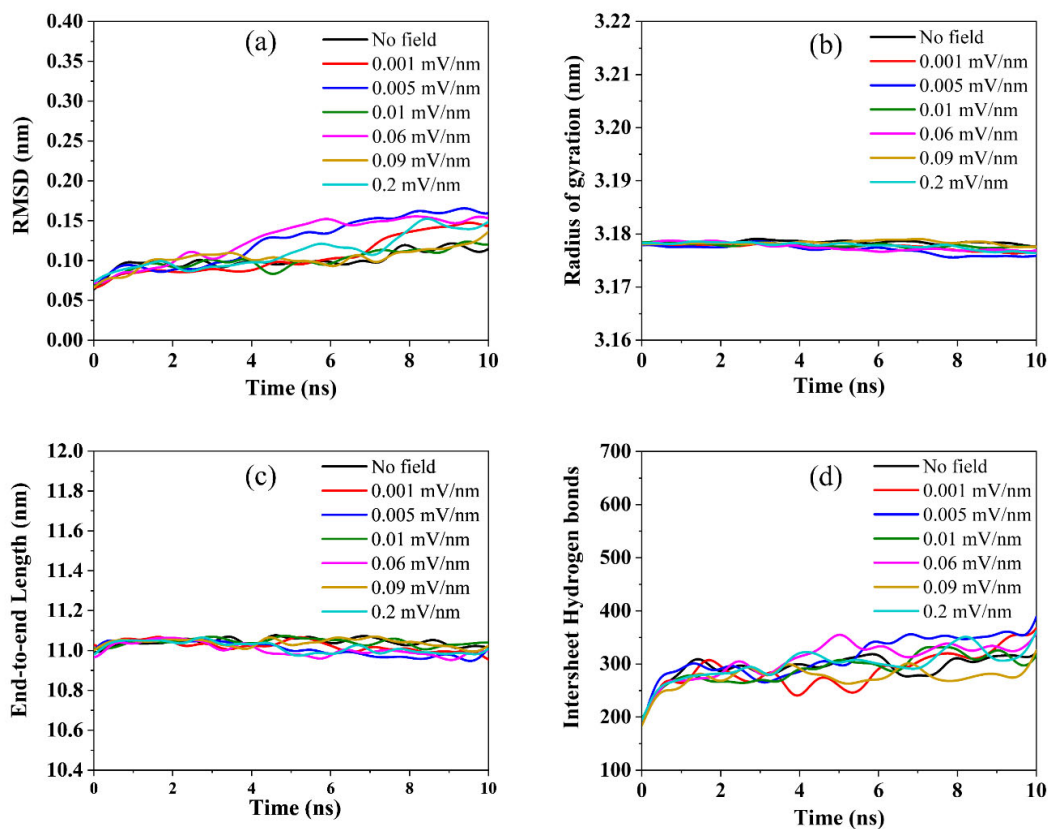

**Figure S1.** Electric field along the z-axis: Time evolution of (a) the root-mean-square deviation (RMSD), (b) radius of gyration, (c) end-to-end length, and (d) intersheet hydrogen bonds.

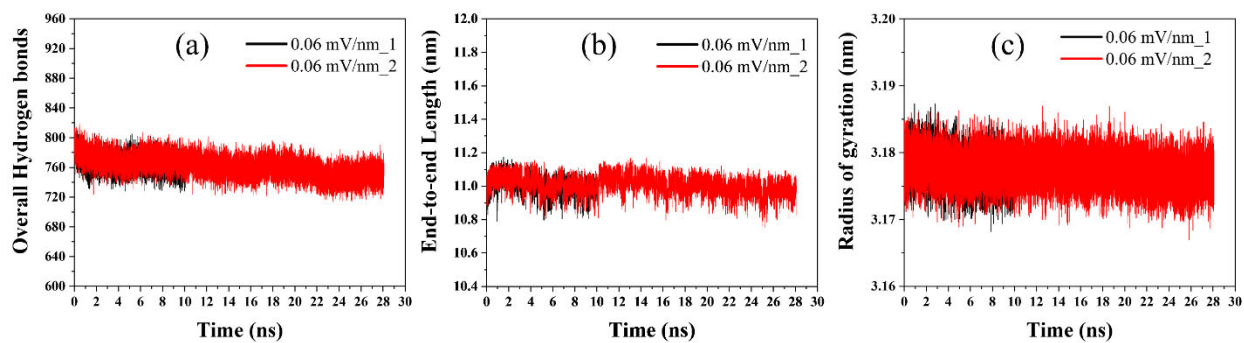

**Figure S2.** Reproducible hydrogen bonds, the radius of gyration, and end-to-end length for the replica MD (0.06 mV/nm\_1 and 0.06 mV/nm\_2).

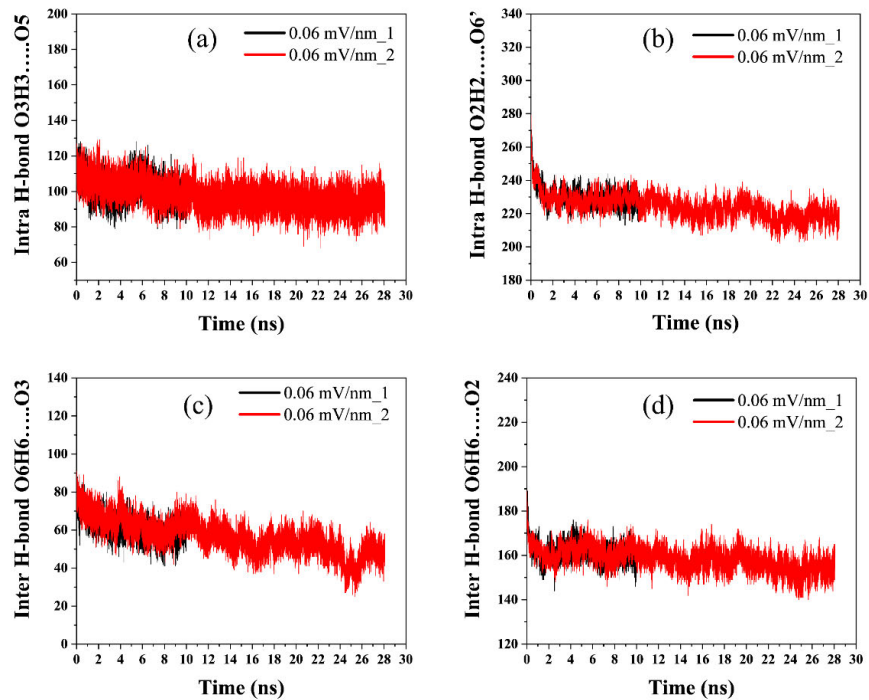

**Figure S3.** Reproducible hydrogen bonds for the replica MD (0.06 mV/nm<sub>1</sub> and 0.06 mV/nm<sub>2</sub>): intra H-bond O3H3.....O5 (a), intra H-bond O2H2.....O6' (b), inter H-bond O6H6.....O3 (c), and inter H-bond O6H6.....O2 (d).

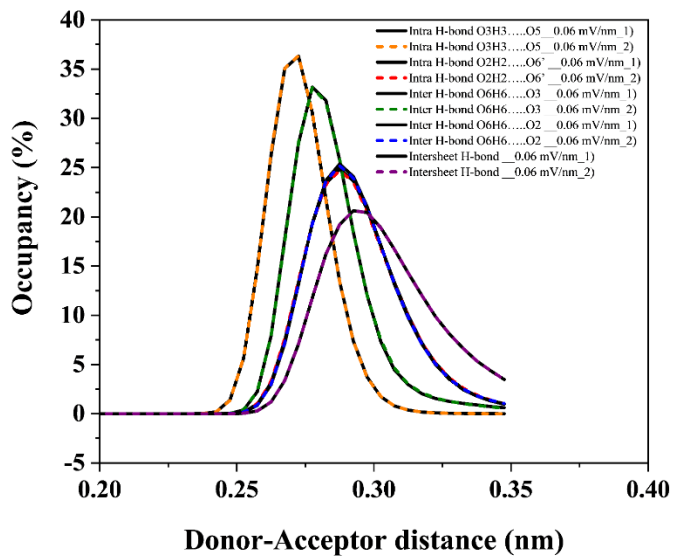

**Figure S4.** The hydrogen bond formation distance between the donor and acceptor atoms of cellulose and their occupancy under the external electric field for the replica MD (0.06 mV/nm<sub>1</sub> and 0.06 mV/nm<sub>2</sub>).

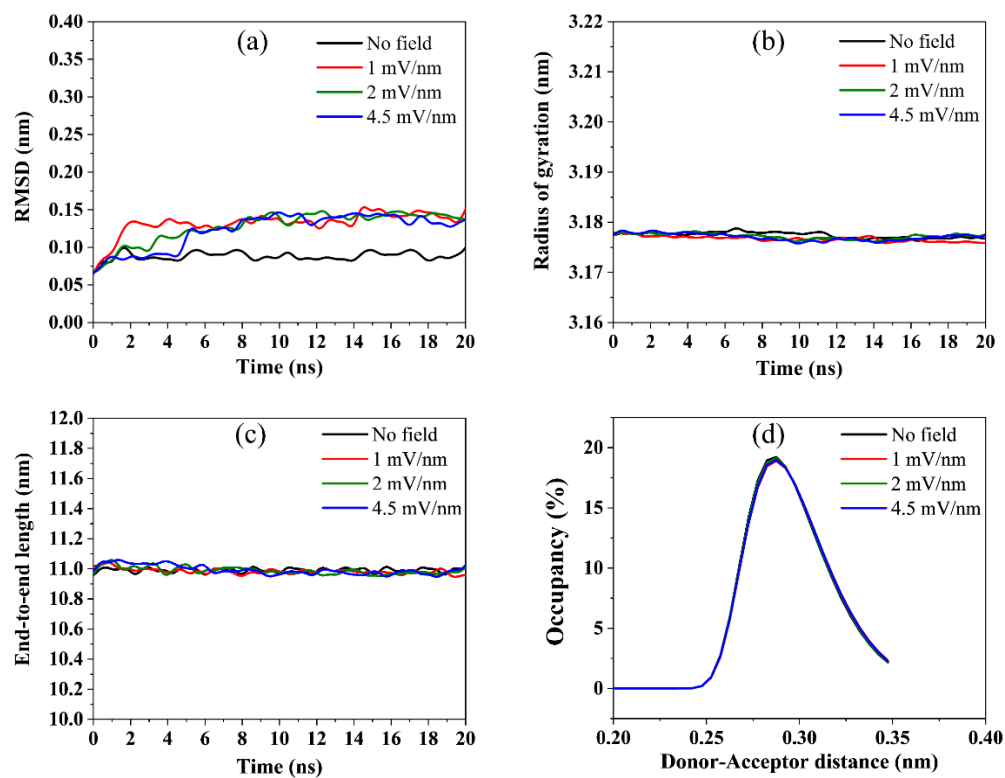

**Figure S5.** The electric field along the x-axis (a) RMSD, (b) radius of gyration, (c) end-to-end length, and (d) donor acceptor distance and occupancy of hydrogen bonds.
